# Supplementary material
Source: publisher figshare collection journal article supplement (https://springernature.figshare.com/ndownloader/files/18233822)
Supplement: Supplementary file 1 [file 18233822]

## Sheet: SM_Table_7
Table S7. Clay weights paste and temper distribution across sites
Site Gumelnita M. Jilava Sultana
Paste Temper									C = chalk
Coarse C 0 0 0									Chaff = chaff
Chaff 0 1 2									NT = No temper
NT 0 0 0									S = sand
S 0 0 0									S_VF = sand_vegetable_fragments
S_VF 0 0 0									SC = sand_chalk
SC 0 0 0									SG = sand_gravel
SG 1 0 0									G = grog
G 0 0 1									GC = grog_chalk
GC 0 0 0									VF = vegetable_fragments
VF 0 0 0									VFS = vegetable_fragments_sand
VFS 0 0 0									VFSS = vegetable_fragments_smashed_shells
VFSS 0 0 0
Fine C 2 0 0
Chaff 0 0 1
NT 0 0 14
S 6 0 1
S_VF 0 0 0
SC 0 0 0
SG 0 0 0
G 0 0 3
GC 0 0 0
VF 2 0 0
VFS 1 0 0
VFSS 1 0 0
Semi-fine C 0 0 0
Chaff 0 2 4
NT 0 0 5
S 2 0 0
S_VF 1 0 0
SC 3 0 0
SG 1 0 0
G 1 4 3
GC 0 0 1
VF 0 0 0
VFS 0 0 0
VFSS 0 0 0
